# Supplementary material for: Effect of In Vitro Gastrointestinal Digestion and Colonic Fermentation on the Stability of Polyphenols in Pistachio (Pistacia Vera L.)
Source: MDPI journal article supplement (doi:10.3390/ijms24054975), 2023-03-04
Supplement: s1 [file s1]

**Table S1.** UHPLC-HRMS characteristics of the polyphenols identified in pistachio varieties

| RT (min)                     | Compound                                                   | Chemical Formula                                | [m/z]-<br>Theoretical | Error<br>(ppm) | MSIMI<br>level <sup>a</sup> |
|------------------------------|------------------------------------------------------------|-------------------------------------------------|-----------------------|----------------|-----------------------------|
| <i>Hydroxybenzoic acids</i>  |                                                            |                                                 |                       |                |                             |
| 2.88                         | 3,4,5-Trihydroxybenzoic acid                               | C <sub>7</sub> H <sub>6</sub> O <sub>5</sub>    | 169.0131              | -0.59          | 1                           |
| 3.15                         | Benzene-1,2-diol                                           | C <sub>6</sub> H <sub>5</sub> O <sub>3</sub>    | 125.0233              | -1.60          | 1                           |
| 3.38                         | Theogallin                                                 | C <sub>14</sub> H <sub>16</sub> O <sub>10</sub> | 343.0663              | -0.87          | 2                           |
| 6.6                          | Galloylshikimic acid                                       | C <sub>14</sub> H <sub>14</sub> O <sub>9</sub>  | 325.0554              | 3.38           | 2                           |
| 8.69                         | 3,4-Dihydroxy-5-((3,4,5-trihydroxybenzoyl)oxy)benzoic acid | C <sub>14</sub> H <sub>10</sub> O <sub>9</sub>  | 321.0241              | 2.18           | 2                           |
| 8.69                         | Methylgallic acid I                                        | C <sub>8</sub> H <sub>7</sub> O <sub>5</sub>    | 183.0287              | 1.64           | 2                           |
| 11.72                        | Methylgallic acid II                                       | C <sub>8</sub> H <sub>7</sub> O <sub>6</sub>    | 183.0287              | 1.64           | 2                           |
| 9.28                         | Vanillic acid                                              | C <sub>8</sub> H <sub>7</sub> O <sub>4</sub>    | 167.0339              | 1.80           | 1                           |
| 9.87                         | Vanillic acid hexoside                                     | C <sub>14</sub> H <sub>18</sub> O <sub>9</sub>  | 329.0867              | 3.34           | 2                           |
| 10.9                         | Ellagic acid                                               | C <sub>14</sub> H <sub>6</sub> O <sub>8</sub>   | 300.9978              | 4.32           | 1                           |
| 12.31                        | Benzoic acid                                               | C <sub>7</sub> H <sub>5</sub> O <sub>2</sub>    | 121.0284              | 0.00           | 1                           |
| 9.88                         | Benzoic acid I                                             | C <sub>8</sub> H <sub>7</sub> O <sub>4</sub>    | 167.0338              | 2.39           | 2                           |
| 11.71                        | Benzoic acid II                                            | C <sub>8</sub> H <sub>7</sub> O <sub>4</sub>    | 167.0338              | 2.39           | 2                           |
| 13.82                        | Benzoic acid III                                           | C <sub>8</sub> H <sub>7</sub> O <sub>4</sub>    | 167.0338              | 2.39           | 2                           |
| 6.02                         | 3,4-Dihydroxybenzoic acid                                  | C <sub>7</sub> H <sub>6</sub> O <sub>4</sub>    | 153.0182              | -1.31          | 1                           |
| <i>Galloyl derivatives</i>   |                                                            |                                                 |                       |                |                             |
| 2.29                         | Mono-galloyl-glucose I                                     | C <sub>13</sub> H <sub>16</sub> O <sub>10</sub> | 331.0659              | 3.02           | 2                           |
| 6.25                         | Mono-galloyl-glucose II                                    | C <sub>13</sub> H <sub>16</sub> O <sub>10</sub> | 331.0659              | 3.02           | 2                           |
| 3.09                         | Galloyl dihexose                                           | C <sub>19</sub> H <sub>26</sub> O <sub>15</sub> | 493.1188              | 0.20           | 2                           |
| 8.39                         | Digalloyl hexose I                                         | C <sub>20</sub> H <sub>20</sub> O <sub>14</sub> | 483.0769              | 2.28           | 2                           |
| 8.92                         | Digalloyl hexose II                                        | C <sub>20</sub> H <sub>20</sub> O <sub>14</sub> | 483.0769              | 2.28           | 2                           |
| 8.94                         | Hydroxy-methoxyphenylgalloyl hexoside I                    | C <sub>20</sub> H <sub>22</sub> O <sub>12</sub> | 453.1027              | 2.43           | 2                           |
| 9.63                         | Hydroxy-methoxyphenylgalloyl hexoside II                   | C <sub>20</sub> H <sub>22</sub> O <sub>12</sub> | 453.1027              | 2.43           | 2                           |
| 9.89                         | Tetra-O-galloyl glucoside I                                | C <sub>34</sub> H <sub>28</sub> O <sub>19</sub> | 787.0994              | 1.40           | 2                           |
| 10.65                        | Tetra-O-galloyl glucoside II                               | C <sub>34</sub> H <sub>28</sub> O <sub>19</sub> | 787.0994              | 1.40           | 2                           |
| 11.4                         | Pentagalloylglucose                                        | C <sub>41</sub> H <sub>32</sub> O <sub>26</sub> | 939.1098              | 0.64           | 2                           |
| <i>Hydroxycinnamic acids</i> |                                                            |                                                 |                       |                |                             |
| 8.07                         | 5-O-caffeoylquinic acid                                    | C <sub>16</sub> H <sub>18</sub> O <sub>9</sub>  | 353.0867              | 0.28           | 1                           |
| 9.17                         | O-caffeoylquinic acid II                                   | C <sub>16</sub> H <sub>18</sub> O <sub>9</sub>  | 353.0867              | 0.28           | 2                           |
| 11.37                        | Sinapic acid                                               | C <sub>11</sub> H <sub>12</sub> O <sub>5</sub>  | 223.0600              | 2.24           | 1                           |
| 8.93                         | Sinapic acid derivative                                    | C <sub>11</sub> H <sub>12</sub> O <sub>5</sub>  | 223.0600              | 2.24           | 2                           |
| 10.61                        | 4'-Hydroxycinnamic acid                                    | C <sub>9</sub> H <sub>8</sub> O <sub>3</sub>    | 163.0395              | -2.45          | 1                           |
| 8.51                         | 4'-Hydroxy-3'-methoxycinnamic acid derivative              | C <sub>10</sub> H <sub>10</sub> O <sub>4</sub>  | 193.0495              | 1.55           | 2                           |
| 7.67                         | 3-(3',4'-Dihydroxyphenyl)propanoic acid                    | C <sub>9</sub> H <sub>9</sub> O <sub>4</sub>    | 181.0495              | 0.55           | 1                           |

|                     |                                |                                                 |          |      |   |
|---------------------|--------------------------------|-------------------------------------------------|----------|------|---|
| <i>Flavones</i>     |                                |                                                 |          |      |   |
| 8.54                | Luteolin hexoside              | C <sub>21</sub> H <sub>20</sub> O <sub>11</sub> | 447.0921 | 1.79 | 2 |
| 14.07               | Luteolin                       | C <sub>15</sub> H <sub>10</sub> O <sub>6</sub>  | 285.0393 | 3.51 | 1 |
| 11.01               | Apigenin hexoside              | C <sub>21</sub> H <sub>20</sub> O <sub>10</sub> | 431.0972 | 1.16 | 2 |
| <i>Flavonols</i>    |                                |                                                 |          |      |   |
| 10.74               | Quercetin 3-rutinoside         | C <sub>27</sub> H <sub>30</sub> O <sub>16</sub> | 609.145  | 0.98 | 1 |
| 10.18               | Myricetin hexoside             | C <sub>21</sub> H <sub>20</sub> O <sub>13</sub> | 479.082  | 1.67 | 2 |
| 12.48               | Myricetin                      | C <sub>15</sub> H <sub>10</sub> O <sub>8</sub>  | 317.0291 | 3.47 | 1 |
| 10.55               | Quercetin hexoside I           | C <sub>21</sub> H <sub>20</sub> O <sub>12</sub> | 463.0871 | 1.73 | 2 |
| 10.98               | Quercetin hexoside II          | C <sub>21</sub> H <sub>20</sub> O <sub>12</sub> | 463.0871 | 1.73 | 2 |
| 10.60               | Quercetin galloyl glucoside I  | C <sub>28</sub> H <sub>24</sub> O <sub>16</sub> | 615.098  | 1.46 | 2 |
| 11.43               | Quercetin galloyl glucoside II | C <sub>28</sub> H <sub>24</sub> O <sub>16</sub> | 615.098  | 1.46 | 2 |
| 14.32               | Quercetin                      | C <sub>15</sub> H <sub>10</sub> O <sub>7</sub>  | 301.0342 | 3.65 | 1 |
| <i>Flavan-3-ols</i> |                                |                                                 |          |      |   |
| 6.33                | Gallocatechin                  | C <sub>15</sub> H <sub>14</sub> O <sub>7</sub>  | 305.0655 | 3.61 | 2 |
| 8.61                | Catechin                       | C <sub>15</sub> H <sub>14</sub> O <sub>6</sub>  | 289.0707 | 4.15 | 1 |
| 9.54                | Epicatechin                    | C <sub>15</sub> H <sub>14</sub> O <sub>6</sub>  | 289.0707 | 2.42 | 1 |
| 9.72                | Epigallocatechin gallate       | C <sub>22</sub> H <sub>18</sub> O <sub>11</sub> | 457.0765 | 0.44 | 1 |
| 11.05               | Epicatechin gallate            | C <sub>22</sub> H <sub>18</sub> O <sub>10</sub> | 441.0816 | 0.91 | 1 |
| 11.88               | Epiafzelechin 3-gallate        | C <sub>22</sub> H <sub>18</sub> O <sub>9</sub>  | 425.0867 | 1.88 | 2 |
| 12.42               | Afzelechin I                   | C <sub>15</sub> H <sub>14</sub> O <sub>5</sub>  | 273.0757 | 2.93 | 2 |
| 12.94               | Afzelechin II                  | C <sub>15</sub> H <sub>14</sub> O <sub>5</sub>  | 273.0757 | 2.93 | 2 |
| 15.23               | Afzelechin III                 | C <sub>15</sub> H <sub>14</sub> O <sub>5</sub>  | 273.0757 | 2.93 | 2 |
| <i>Flavanones</i>   |                                |                                                 |          |      |   |
| 11.02               | Eriodictyol hexoside           | C <sub>21</sub> H <sub>22</sub> O <sub>11</sub> | 449.1078 | 1.11 | 2 |
| 13.88               | Eriodictyol                    | C <sub>15</sub> H <sub>12</sub> O <sub>6</sub>  | 287.055  | 2.79 | 2 |
| 11.98               | Naringenin hexoside            | C <sub>21</sub> H <sub>22</sub> O <sub>10</sub> | 433.1129 | 1.39 | 2 |
| 11.98               | Naringenin                     | C <sub>15</sub> H <sub>12</sub> O <sub>5</sub>  | 271.0601 | 2.21 | 1 |
| <i>Flavanonols</i>  |                                |                                                 |          |      |   |
| 11.39               | Taxifolin                      | C <sub>15</sub> H <sub>12</sub> O <sub>7</sub>  | 303.0499 | 3.30 | 1 |
| <i>Stilbenes</i>    |                                |                                                 |          |      |   |
| 10.87               | Resveratrol hexoside           | C <sub>20</sub> H <sub>22</sub> O <sub>8</sub>  | 389.1231 | 2.31 | 2 |

<sup>a</sup> Annotation from Summer et al. Compounds identified at MSIMI level 1 means there was a commercially available standard. Compounds identified at MSIMS level 2 were tentatively identified. RT: retention time.

**Table S2.** UHPLC-HRMS Characteristics of Phenolic Acid Catabolites Identified in Pistachio and its by-products Faecal Incubates

| Rt (min) | Catabolites                                 | Chemical Formula                               | [m/z]-Theoretical | Error (ppm) | MSIMI level <sup>a</sup> |
|----------|---------------------------------------------|------------------------------------------------|-------------------|-------------|--------------------------|
| 7.32     | 3,4-Dihydroxyphenylacetic acid              | C <sub>8</sub> H <sub>7</sub> O <sub>4</sub>   | 167.0338          | -2.99       | 1                        |
| 8.18     | 4-Hydroxybenzoic acid                       | C <sub>7</sub> H <sub>5</sub> O <sub>3</sub>   | 137.0233          | 0.00        | 1                        |
| 8.84     | 3-(3',4'-Dihydroxyphenyl)propanoic acid     | C <sub>9</sub> H <sub>9</sub> O <sub>4</sub>   | 181.0495          | 0.55        | 1                        |
| 8.85     | 3-(Phenyl)acetic acid                       | C <sub>8</sub> H <sub>7</sub> O <sub>2</sub>   | 135.0440          | 0.74        | 1                        |
| 10.12    | 3-Hydroxyphenylacetic acid                  | C <sub>9</sub> H <sub>9</sub> O <sub>3</sub>   | 151.0389          | 0.66        | 2                        |
| 10.28    | 3,4-Dihydroxyphenyl-γ-valerolactone         | C <sub>11</sub> H <sub>12</sub> O <sub>4</sub> | 207.0657          | 0.415       | 2                        |
| 10.91    | 3-(3-methoxy-4-hydroxyphenyl)propionic acid | C <sub>10</sub> H <sub>11</sub> O <sub>4</sub> | 195.0652          | 3.59        | 1                        |
| 10.95    | 3-(4'-Hydroxyphenyl)propanoic acid          | C <sub>9</sub> H <sub>9</sub> O <sub>3</sub>   | 165.0546          | 0.66        | 1                        |
| 11.45    | 4'-Hydroxy-3'-methoxycinnamic acid          | C <sub>10</sub> H <sub>10</sub> O <sub>4</sub> | 193.0495          | 1.04        | 1                        |
| 11.6     | 3'-Hydroxy-4'-methoxycinnamic acid          | C <sub>10</sub> H <sub>9</sub> O <sub>4</sub>  | 193.0495          | 2.59        | 1                        |
| 11.74    | 3-(3'-Hydroxyphenyl)propanoic acid          | C <sub>7</sub> H <sub>6</sub> O <sub>4</sub>   | 165.0546          | 0.66        | 1                        |
| 14.45    | 3-(Phenyl)propionic acid                    | C <sub>9</sub> H <sub>9</sub> O <sub>2</sub>   | 149.0597          | 0.67        | 1                        |

<sup>a</sup> Annotation from the Summer et al. Compounds identified at MSIMI level 1 means there was a commercially available standard. RT: retention time.

**Table S3.** Hydroxybenzoic acids group in pistachios during fermentation (nmol/ g)

|                     | 3,4,5-Trihydroxybenzoic acid | Benzene-1,2-diol) | 3-Galloyl-quinic acid | 3,4-Dihydroxybenzoic acid | Galloyl shikimic acid | Vanillic acid hexoside | Ellagic acid | Benzoic acid derivative II | Total  |
|---------------------|------------------------------|-------------------|-----------------------|---------------------------|-----------------------|------------------------|--------------|----------------------------|--------|
| <b>Aegina</b>       |                              |                   |                       |                           |                       |                        |              |                            |        |
| <b>0 h</b>          | 0.21 bc                      | nd                | nd                    | 0.154 ab                  | 0.0005                | 0.57                   | 0.244 a      | 0.198 a                    | 1.38 a |
| <b>4 h</b>          | 0.45 a                       | nd                | nd                    | 0.166 a                   | nd                    | nd                     | 0.237 b      | 0.176 b                    | 1.03 b |
| <b>8 h</b>          | 0.34 ab                      | nd                | nd                    | 0.148 ab                  | nd                    | nd                     | 0.236 b      | 0.169 b                    | 0.90 c |
| <b>24 h</b>         | 0.03 c                       | 0.07              | nd                    | 0.039 c                   | nd                    | nd                     | nd           | nd                         | 0.14 d |
| <b>Golden Hills</b> |                              |                   |                       |                           |                       |                        |              |                            |        |
| <b>0 h</b>          | <LOQ                         | nd                | nd                    | 0.046 b                   | 0.0004                | 0.55                   | 0.243 a      | 0.13                       | 0.97 a |
| <b>4 h</b>          | 0.06 a                       | nd                | nd                    | 0.071 a                   | nd                    | nd                     | 0.237 b      | 0.13                       | 0.50 b |
| <b>8 h</b>          | 0.05 a                       | nd                | nd                    | 0.060 ab                  | nd                    | nd                     | 0.242 ab     | 0.13                       | 0.49 c |
| <b>24 h</b>         | <LOQ                         | 0.05              | nd                    | 0.024 c                   | nd                    | nd                     | nd           | nd                         | 0.07 d |
| <b>Kastel</b>       |                              |                   |                       |                           |                       |                        |              |                            |        |
| <b>0 h</b>          | 0.31 a                       | nd                | 0.005                 | 0.092 a                   | 0.0004                | 0.601                  | 0.246        | 0.174 a                    | 1.43 a |
| <b>4 h</b>          | 0.05 c                       | nd                | nd                    | 0.078 a                   | nd                    | nd                     | 0.239        | 0.138 b                    | 0.51 c |
| <b>8 h</b>          | 0.11 b                       | nd                | nd                    | 0.082 a                   | nd                    | nd                     | 0.241        | 0.145 ab                   | 0.58 b |
| <b>24 h</b>         | <LOQ                         | 0.04              | nd                    | 0.017 b                   | nd                    | nd                     | nd           | nd                         | 0.06 d |
| <b>Kerman</b>       |                              |                   |                       |                           |                       |                        |              |                            |        |
| <b>0 h</b>          | <LOQ                         | nd                | 0.004                 | 0.036 b                   | 0.0004                | 0.553                  | 0.238        | 0.136 b                    | 0.97 a |
| <b>4 h</b>          | 0.09 b                       | nd                | nd                    | 0.059 a                   | nd                    | nd                     | 0.243        | 0.149 a                    | 0.54 c |
| <b>8 h</b>          | 0.14 a                       | nd                | nd                    | 0.060 a                   | nd                    | nd                     | 0.240        | 0.158 a                    | 0.59 b |
| <b>24 h</b>         | <LOQ                         | 0.06              | nd                    | 0.015 c                   | nd                    | nd                     | nd           | nd                         | 0.07 d |
| <b>Larnaka</b>      |                              |                   |                       |                           |                       |                        |              |                            |        |
| <b>0 h</b>          | 0.26 a                       | nd                | 0.01                  | 0.173 a                   | 0.001                 | 0.609                  | 0.238        | 0.249 a                    | 1.54 a |
| <b>4 h</b>          | 0.37 a                       | nd                | nd                    | 0.204 a                   | nd                    | nd                     | 0.235        | 0.175 b                    | 0.98 b |
| <b>8 h</b>          | 0.35 a                       | nd                | nd                    | 0.180 a                   | nd                    | nd                     | 0.238        | 0.185 b                    | 0.95 c |
| <b>24 h</b>         | 0.04 b                       | 0.11              | nd                    | 0.031 b                   | nd                    | nd                     | nd           | nd                         | 0.18 d |
| <b>Sirora</b>       |                              |                   |                       |                           |                       |                        |              |                            |        |
| <b>0 h</b>          | 0.06 b                       | nd                | 0.01                  | 0.113 b                   | 0.0005                | 0.544                  | 0.236        | 0.144                      | 1.10 a |
| <b>4 h</b>          | 0.12 b                       | nd                | nd                    | 0.140 a                   | nd                    | nd                     | 0.239        | 0.137                      | 0.64 c |
| <b>8 h</b>          | 0.29 a                       | nd                | nd                    | 0.167 a                   | nd                    | nd                     | 0.235        | 0.145                      | 0.84 b |
| <b>24 h</b>         | <LOQ                         | 0.04              | nd                    | 0.038 c                   | nd                    | nd                     | nd           | nd                         | 0.08 d |

Values with different letters are significantly different as determined by Tukey test.

**Table S4.** Flavan-3-ols group in pistachios during fermentation (nmol/ g)

|                     | Catechin | Epi catechin | Epigallo catechin gallate | Epi catechin gallate | Epiafzelechin3 -gallate | Afzelechin III | Total  |
|---------------------|----------|--------------|---------------------------|----------------------|-------------------------|----------------|--------|
| <b>Aegina</b>       |          |              |                           |                      |                         |                |        |
| <b>0 h</b>          | 0.018 a  | 0.022 a      | nd                        | 0.013                | 0.013                   | 0.019 a        | 0.08 c |
| <b>4 h</b>          | 0.010 b  | 0.020 ab     | 0.13                      | 0.013                | 0.012                   | 0.018 b        | 0.21 a |
| <b>8 h</b>          | 0.002 c  | 0.020 ab     | 0.13                      | 0.012                | 0.012                   | 0.018 b        | 0.20 b |
| <b>24 h</b>         | <LOQ     | 0.019 b      | nd                        | 0.012                | nd                      | nd             | 0.03 d |
| <b>Golden Hills</b> |          |              |                           |                      |                         |                |        |
| <b>0 h</b>          | <LOQ     | 0.019        | nd                        | 0.013                | 0.013                   | 0.018          | 0.06 b |
| <b>4 h</b>          | <LOQ     | 0.018        | 0.11                      | 0.012                | 0.012                   | 0.018          | 0.18 a |
| <b>8 h</b>          | <LOQ     | 0.019        | nd                        | 0.012                | 0.009                   | 0.018          | 0.06 c |
| <b>24 h</b>         | <LOQ     | 0.019        | nd                        | 0.012                | nd                      | nd             | 0.03 d |
| <b>Kastel</b>       |          |              |                           |                      |                         |                |        |
| <b>0 h</b>          | 0.022    | 0.026 a      | nd                        | 0.014 a              | 0.014 a                 | 0.020 a        | 0.10 b |
| <b>4 h</b>          | <LOQ     | 0.018 b      | nd                        | 0.012 b              | 0.012 b                 | 0.018 b        | 0.06 c |
| <b>8 h</b>          | <LOQ     | 0.020 ab     | 0.12                      | 0.012 b              | 0.012 b                 | 0.018 b        | 0.19 a |
| <b>24 h</b>         | <LOQ     | 0.020 ab     | nd                        | 0.012 b              | nd                      | nd             | 0.03 d |
| <b>Kerman</b>       |          |              |                           |                      |                         |                |        |
| <b>0 h</b>          | 0.002 a  | 0.021 a      | nd                        | 0.012 a              | 0.013                   | 0.018          | 0.07 b |
| <b>4 h</b>          | 0.001 b  | 0.022 a      | nd                        | 0.012 a              | 0.013                   | 0.019          | 0.07 a |
| <b>8 h</b>          | <LOQ     | 0.021 a      | nd                        | 0.012 a              | 0.012                   | 0.018          | 0.06 c |
| <b>24 h</b>         | <LOQ     | 0.018 b      | nd                        | 0.011 b              | nd                      | nd             | 0.03 d |
| <b>Larnaka</b>      |          |              |                           |                      |                         |                |        |
| <b>0 h</b>          | 0.057 a  | 0.025 a      | nd                        | 0.014 a              | 0.013                   | 0.021 a        | 0.13 b |
| <b>4 h</b>          | 0.025 b  | 0.022 b      | 0.12                      | 0.012 b              | 0.012                   | 0.018 b        | 0.21 a |
| <b>8 h</b>          | 0.021 b  | 0.023 b      | 0.12                      | 0.012 b              | 0.012                   | 0.018 b        | 0.21 a |
| <b>24 h</b>         | <LOQ     | 0.018 c      | nd                        | 0.012 b              | nd                      | nd             | 0.03 c |
| <b>Sirora</b>       |          |              |                           |                      |                         |                |        |
| <b>0 h</b>          | 0.007    | 0.020 a      | 0.12                      | 0.013                | 0.013                   | 0.018          | 0.19 a |
| <b>4 h</b>          | <LOQ     | 0.019 ab     | 0.12                      | 0.012                | 0.012                   | 0.018          | 0.18 b |
| <b>8 h</b>          | <LOQ     | 0.020 a      | 0.12                      | 0.012                | 0.012                   | 0.018          | 0.18 b |
| <b>24 h</b>         | <LOQ     | 0.018 b      | nd                        | 0.012                | nd                      | nd             | 0.03 c |

Values with different letters are significantly different as determined by Tukey test.
